# Supplementary material for: Whole-brain modelling identifies distinct but convergent paths to unconsciousness in anaesthesia and disorders of consciousness
Source: PubMed Central journal article supplement (PMC9021270; doi:10.1038/s42003-022-03330-y), 2022-04-20
Supplement: 42003_2022_3330_MOESM2_ESM.pdf [file 42003_2022_3330_MOESM2_ESM.pdf]

## Description of Additional Supplementary Files

**File name:** Supplementary Data 1

**Description:** Source data for Figures 2b and 3.

**File name:** Supplementary Data 2

**Description:** Source data for Figure 4.

**File name:** Supplementary Data 3

**Description:** Source data for Figure 5.

**File name:** Supplementary Data 4

**Description:** Source data for Figure 6.
